# Supplementary material for: Design, Synthesis, In Silico and POM Studies for the Identification of the Pharmacophore Sites of Benzylidene Derivatives
Source: MDPI journal article supplement (doi:10.3390/molecules28062613), 2023-03-13
Supplement: s1 [file s1]

Design, Synthesis, Molecular Docking, Dynamics and POM Studies for the Identification of the Pharmacophore Sites of Benzylidene Derivatives

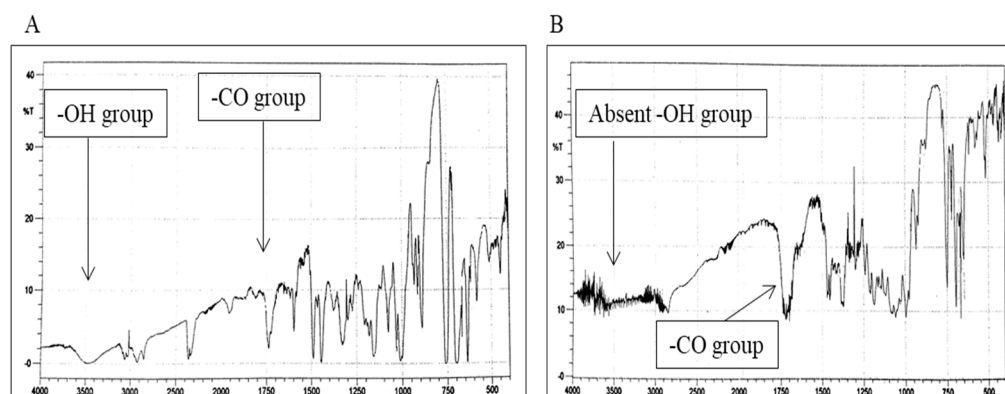

Figure S1. FTIR spectra of A: compound 3 and B: compound 4.

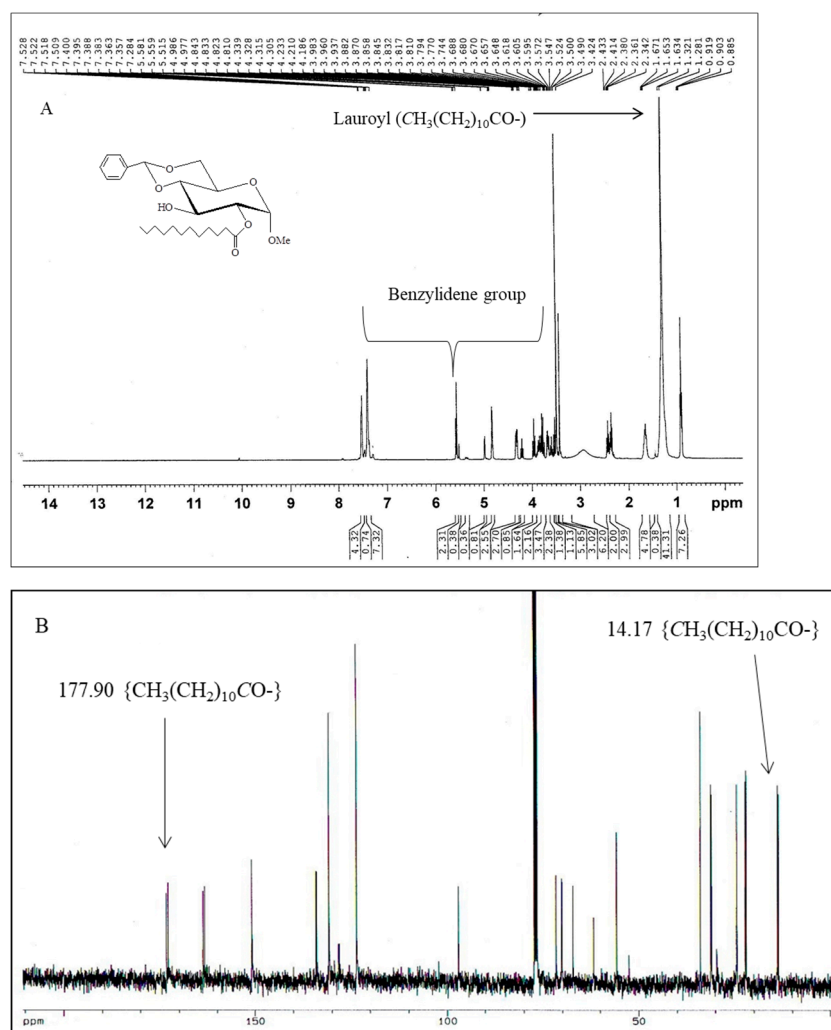

Figure S2. (A) <sup>1</sup>H-NMR and (B) <sup>13</sup>C-NMR spectra of the compound 3.

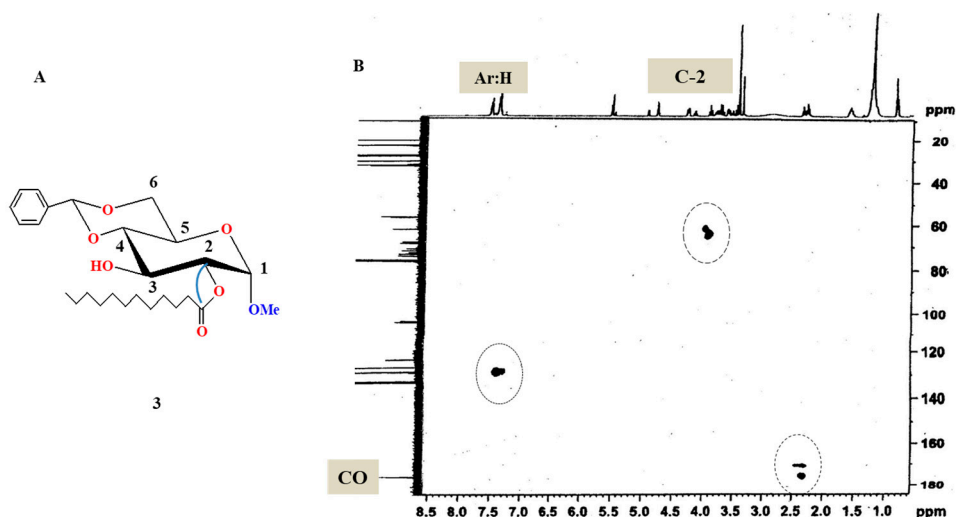

**Figure S3.** The HMBC correlations of (A) compound 2 and (B) CO with H-2 and ArH protons.

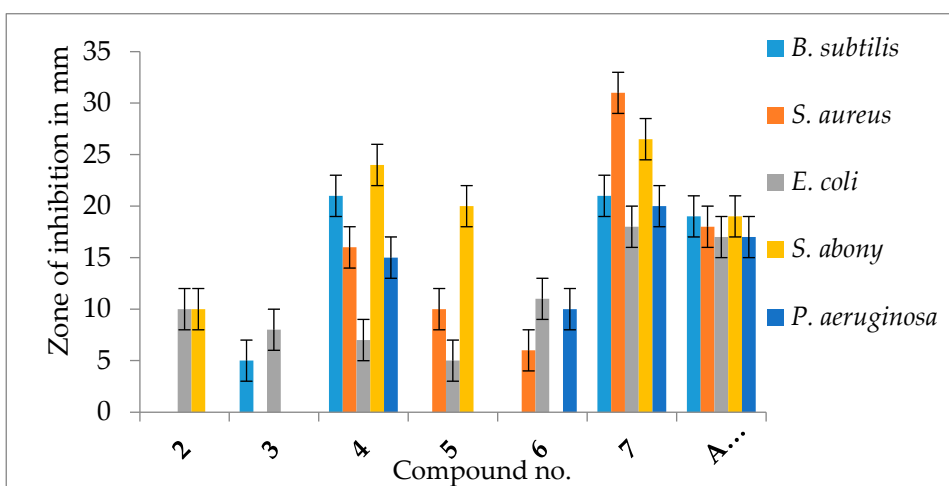

**Figure S4.** Zone of inhibition observed against both the Gram-positive and Gram-negative bacteria by the tested compounds.

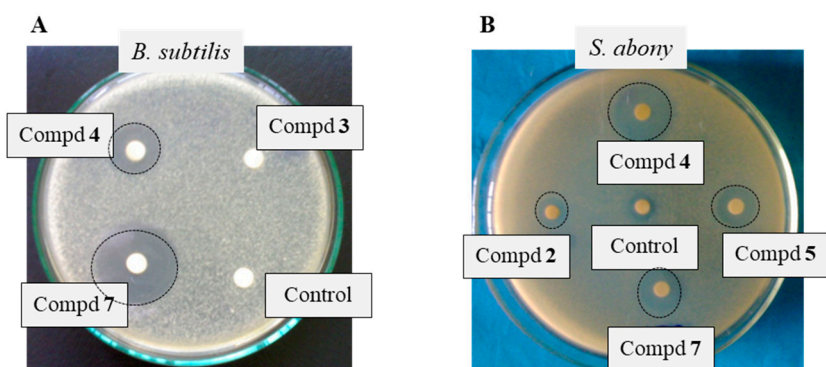

**Figure S5.** Inhibition zones were observed against A) *B. subtilis* by compounds 3, 4, and 7; B) *S. abony* by compounds 2, 4, 5, and 7. Control (in DMSO) was treated as a negative control.

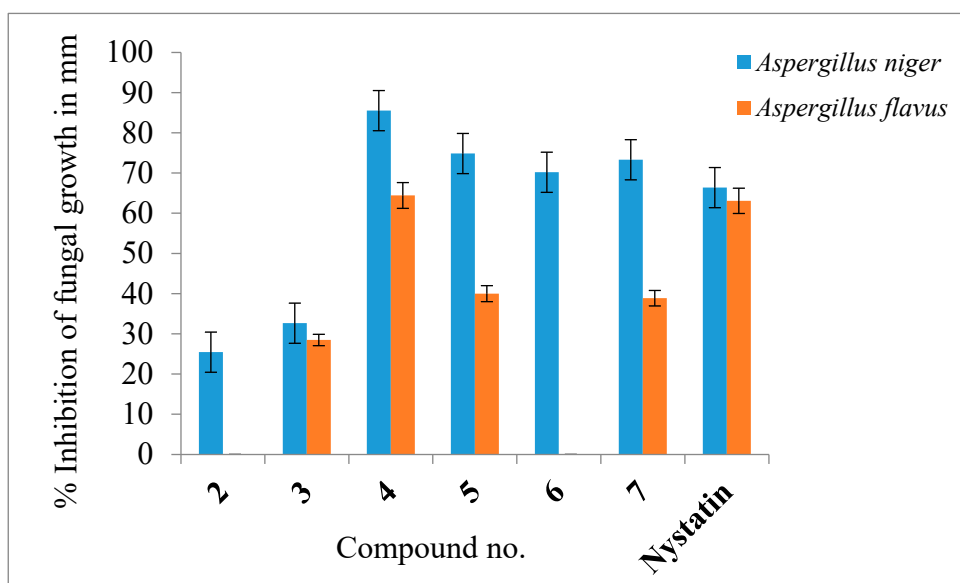

**Figure S6.** Antifungal activities of the synthesized test compounds.

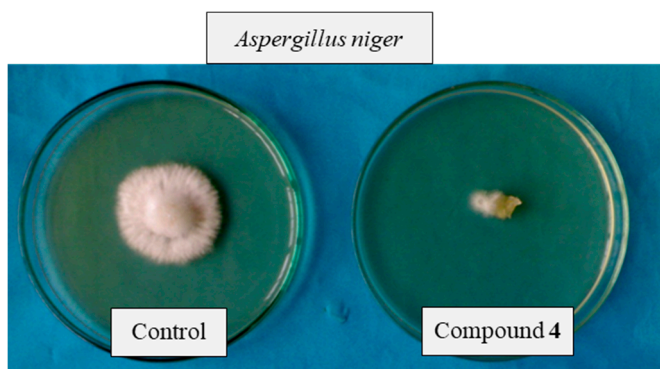

**Figure S7.** Inhibition of fungal growth observed in *A. niger* by the compound 4.

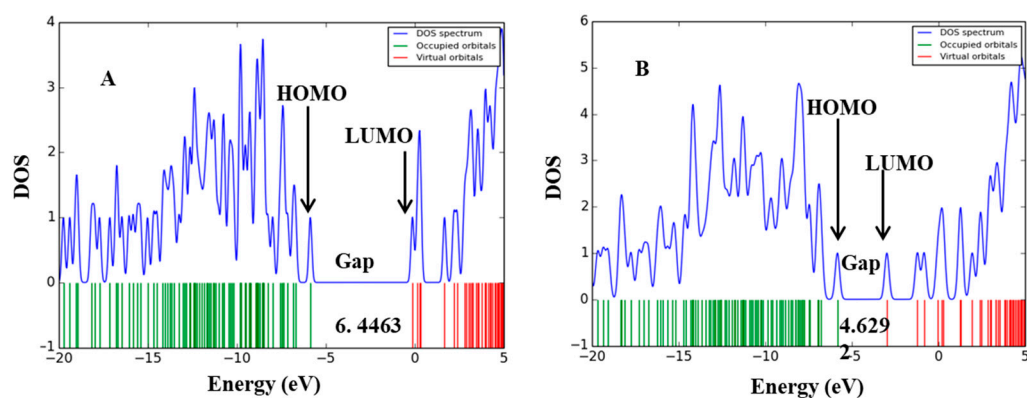

**Figure S8.** (A); DOS plot of compound 3 (B); DOS plot of compound 7.

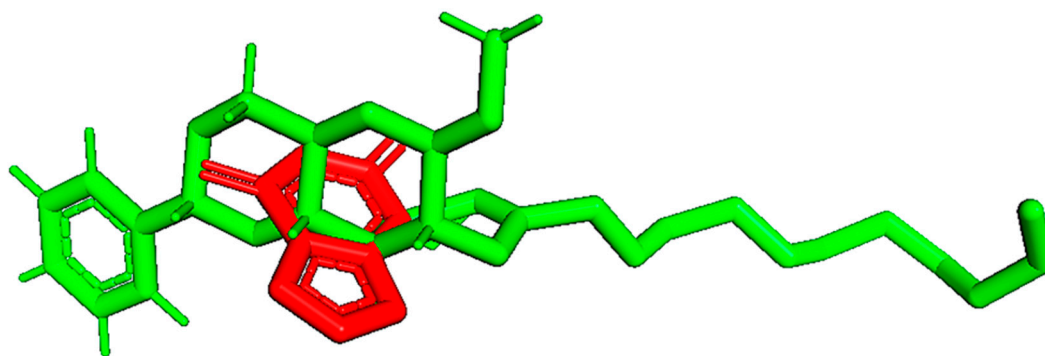

**Figure S9.** Re-docking pose with the RMSD value of  $< 2\text{\AA}$  (Red = Original, Green = Docked).

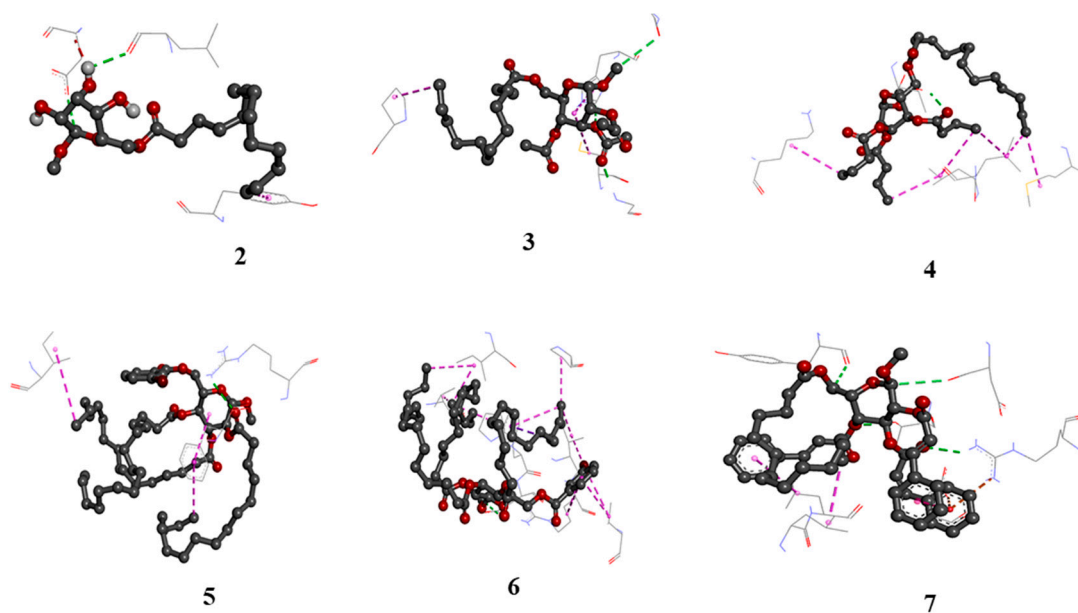

**Figure S10.** Nonbonding interactions of MGB derivatives (2-7) with 1KS5 generated by Discovery Studio.

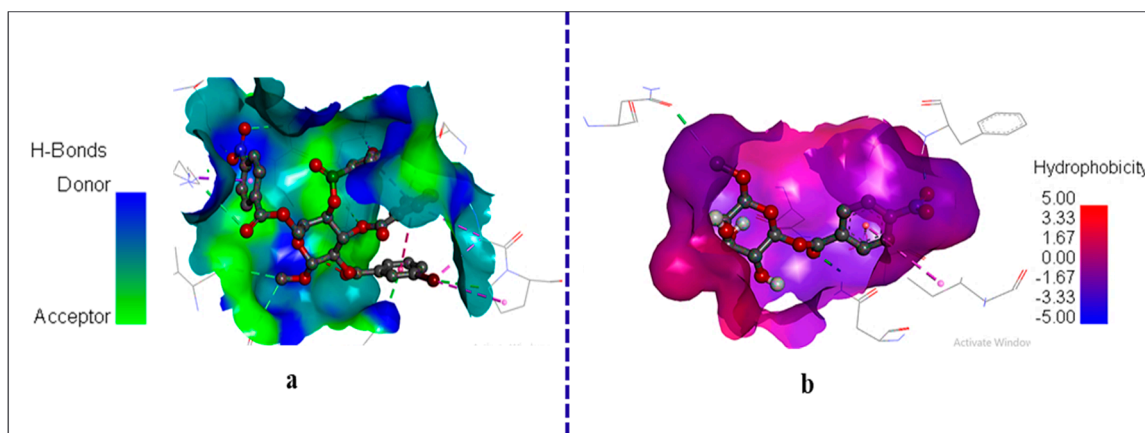

**Figure S11.** (a); Hydrogen bond surface of compound 7 (b); Hydrophobic bond surface of compound 7.

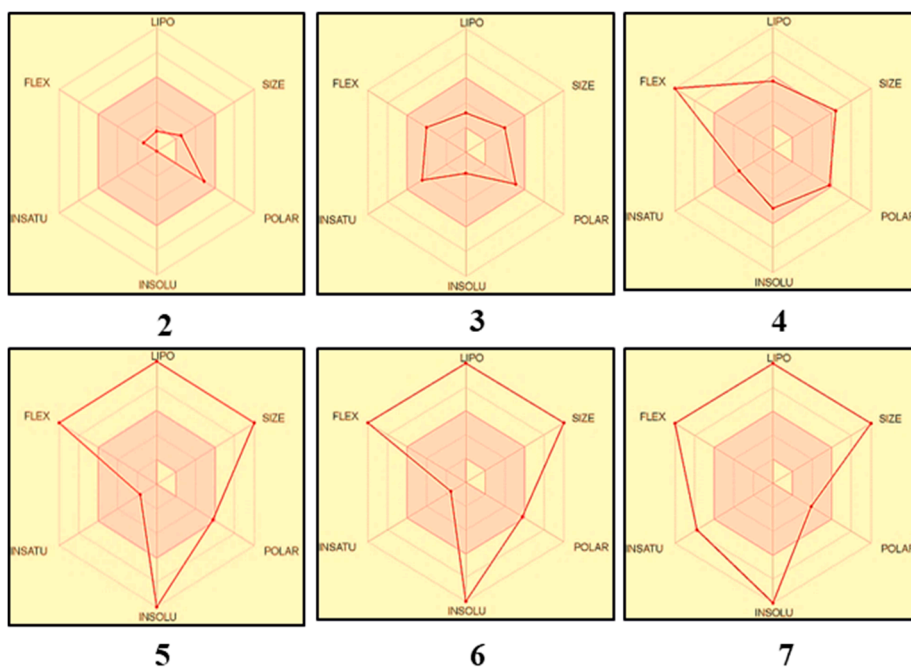

**Figure S12.** Bioactivity radar charts of the MGB derivatives (2-7) where FLEX: Flexibility, LIPO: Lipophilicity, INSATU: Insaturation and INSOLU: Insolubility.

**Table S1**  $^1\text{H}$ -NMR and  $^{13}\text{C}$ -NMR shift values of compound 3.  $^1\text{H}$ - and  $^{13}\text{C}$ - assignments were obtained from HSQC and HMBC experiments.

| Position                                          | $\delta_{\text{H}}$ (ppm) (J Hz)                        | (HSQC)<br>$\delta_{\text{C}}$ (ppm) | HMBC                 |
|---------------------------------------------------|---------------------------------------------------------|-------------------------------------|----------------------|
| Ar-H                                              | 7.52 (m)                                                | 136.20                              | H: Ar                |
| Ar-H                                              | 7.48 (m)                                                | 129.10                              | H: Ar                |
| PhCH-                                             | 5.5 (s)                                                 | 125.31                              | H: Ar                |
| C-1                                               | 4.88 (d, $J = 4.2$ )                                    | 105.09                              | H: 2, $\text{OCH}_3$ |
| C-2                                               | 4.73 (dd, $J = 3.7$ and $9.7$ )                         | 73.95                               | H: 1, 3              |
| C-3                                               | 4.22 (t, $J = 9.7$ )                                    | 74.25                               | H: 2, 4              |
| C-4                                               | 3.51 (t, $J = 9.7$ )                                    | 76.09                               | H: 3, 5              |
| C-5                                               | 3.79 (ddd, $J = 4.7, 9.7$ and $14.1$ )                  | 69.35                               | H: 4, 6a, 6b         |
| C-6a, 6b                                          | 3.96 (dd, $J = 4.7$ and $10.1$ ); 3.78 (t, $J = 10.1$ ) | 62.05                               | H: 2, CO; H: 5, CO   |
| $\text{OCH}_3$                                    | 3.42 (s)                                                | 58.06                               | H: 1                 |
| $\text{CH}_3(\text{CH}_2)_9\text{CH}_2\text{CO-}$ | ---                                                     | 177.90                              | H: 1, 3              |

**Table S2** Structures of synthesized methyl 4,6-O-benzylidene- $\alpha$ -D-glucopyranoside derivatives 2-7.

| Entry | Molecular formula | Structures |
|-------|-------------------|------------|
| 2     | $C_{14}H_{18}O_6$ |            |
| 3     | $C_{26}H_{40}O_7$ |            |
| 4     | $C_{40}H_{66}O_8$ |            |
| 5     | $C_{42}H_{70}O_8$ |            |
| 6     | $C_{45}H_{54}O_7$ |            |
| 7     | $C_{35}H_{46}O_8$ |            |

**Table S3** MIC and MBC values in  $\mu\text{g/ml}$  compounds **4** and **7** against tested bacteria.

| MIC values in $\mu\text{g/mL}$ |                      |                    |                    |                    |                    |
|--------------------------------|----------------------|--------------------|--------------------|--------------------|--------------------|
| Entry                          | <i>P. aeruginosa</i> | <i>E. coli</i>     | <i>S. abony</i>    | <i>S. aureus</i>   | <i>B. subtilis</i> |
| <b>4</b>                       | 1350.00 $\pm$ 0.01   | 1350.00 $\pm$ 0.01 | 675.00 $\pm$ 0.01  | 1350.00 $\pm$ 0.01 | 675.00 $\pm$ 0.01  |
| <b>7</b>                       | 1350.00 $\pm$ 0.01   | 1350.00 $\pm$ 0.01 | 675.00 $\pm$ 0.01  | 1350.00 $\pm$ 0.01 | 675.00 $\pm$ 0.01  |
| <b>*Azithromycin</b>           | 225.00 $\pm$ 0.01    | 225.00 $\pm$ 0.01  | 240.00 $\pm$ 0.01  | 215.00 $\pm$ 0.01  | 250.00 $\pm$ 0.01  |
| MBC values in $\mu\text{g/mL}$ |                      |                    |                    |                    |                    |
| <b>4</b>                       | 2700.00 $\pm$ 0.02   | 2700.00 $\pm$ 0.02 | 5400.00 $\pm$ 0.04 | 2700.00 $\pm$ 0.02 | 2700.00 $\pm$ 0.02 |
| <b>7</b>                       | 1350.00 $\pm$ 0.01   | 5400.00 $\pm$ 0.04 | 2700.00 $\pm$ 0.02 | 2700.00 $\pm$ 0.04 | 2700.00 $\pm$ 0.02 |
| <b>*Azithromycin</b>           | 275.00 $\pm$ 0.01    | 250.00 $\pm$ 0.01  | 290.00 $\pm$ 0.01  | 310.00 $\pm$ 0.01  | 310.00 $\pm$ 0.01  |

\*Azithromycin = positive control

**Table S4** Calculated frontier molecular orbital parameters of derivatives **2-7**.

| Entry | HOMO    | LUMO    | $\Delta E$ | IP     | EA     | $\eta$ | $\mu$   | S      | X      | $\omega$ |
|-------|---------|---------|------------|--------|--------|--------|---------|--------|--------|----------|
| 2     | -6.7840 | -0.3665 | 6.4175     | 6.7840 | 0.3665 | 3.2087 | -3.5753 | 0.1558 | 3.6784 | 0.9959   |
| 3     | -6.9016 | -0.4552 | 6.4463     | 6.9016 | 0.4552 | 3.2231 | -3.6784 | 0.1551 | 3.9053 | 1.0494   |
| 4     | -7.1258 | -0.6849 | 6.4409     | 7.1258 | 0.6849 | 3.2204 | -3.9053 | 0.1552 | 3.8755 | 1.1839   |
| 5     | -7.0956 | -0.6555 | 6.4401     | 7.0956 | 0.6555 | 3.2200 | -3.8755 | 0.1552 | 3.4369 | 1.1661   |
| 6     | -6.3114 | -0.5624 | 5.7489     | 6.3114 | 0.5624 | 2.8744 | -3.4369 | 0.1739 | 4.2732 | 1.0273   |
| 7     | -6.5878 | -1.9586 | 4.6292     | 6.5878 | 1.9586 | 2.3146 | -4.2732 | 0.2160 | 4.2732 | 1.9723   |

Gap  $\Delta E$ : LUMO-HOMO, IP (-HOMO): Ionization potential, EA (-LUMO): Electron affinity, X  $(IP+EA)/2$ : Electronegativity,  $\eta$   $(IP-EA)/2$ : Chemical hardness, S  $(1/2\eta)$ : chemical softness,  $\mu$   $-(IP+EA)/2$ : Chemical potential,  $\omega$   $(\mu^2/2\eta)$ : Electrophilic index.

**Table S5** iGEMDOCK protein-ligand interactions energy of compounds with fungal and bacterial target proteins.

| Entry | Fungal target proteins |                    | Bacterial target proteins |                    |
|-------|------------------------|--------------------|---------------------------|--------------------|
|       | 1KS5<br>(kcal/mol)     | 1R51<br>(kcal/mol) | 4A1J<br>(kcal/mol)        | 5IQR<br>(kcal/mol) |
| 2     | -85.94                 | -84.51             | -83.15                    | -103.03            |
| 3     | -108.10                | -106.05            | -108.52                   | -104.54            |
| 4     | -140.86                | -116.11            | -134.80                   | -121.84            |
| 5     | -136.18                | -117.41            | -149.84                   | -130.56            |
| 6     | -126.71                | -112.70            | -126.75                   | -122.84            |
| 7     | -126.88                | -118.50            | -115.35                   | -120.40            |

**Table S6** Calculated SwissADME parameters.

| Parameters | 2      | 3      | 4      | 5      | 6      | 7      |
|------------|--------|--------|--------|--------|--------|--------|
| MW         | 282.29 | 464.59 | 674.95 | 703.00 | 706.91 | 580.75 |
| TPSA       | 77.38  | 83.45  | 89.52  | 89.52  | 72.45  | 72.45  |
| RB         | 2      | 14     | 28     | 30     | 19     | 18     |
| HBA        | 6      | 7      | 8      | 8      | 7      | 7      |
| HBD        | 2      | 1      | 0      | 0      | 0      | 0      |
| MLogP      | -0.01  | 2.63   | 5.16   | 5.50   | 5.37   | 4.02   |
| WLogP      | -0.13  | 4.34   | 9.59   | 10.37  | 9.25   | 6.97   |
| MR         | 67.49  | 125.30 | 192.72 | 202.34 | 203.37 | 164.45 |
| GIA        | High   | High   | Low    | Low    | Low    | High   |
| LipVi      | 0      | 0      | 2      | 2      | 2      | 1      |
| GhoVi      | 0      | 1      | 4      | 4      | 4      | 4      |

MW: Molecular weight, TPSA: Topological Polar Surface Area, RB: Number of rotatable bonds, HBA: Number of hydrogen acceptors, HBD: Number of hydrogen donors, MLogP: Topological method, WLogP atomistic method octanol/water partition coefficient, MR: Molar refractivity, GIA: Gastrointestinal absorption, LipVi: Lipinski violations, GhoVi: Ghose violations.

**Table S7** Strains of bacteria and fungi used for antimicrobial activity tests.

| Types of organisms |          | Tested organisms and strains code |             |
|--------------------|----------|-----------------------------------|-------------|
| Bacteria           | Gram +ve | <i>Staphylococcus aureus</i>      | ATCC 6538   |
|                    |          | <i>Bacillus subtilis</i>          | ATCC 6633   |
|                    | Gram -ve | <i>Salmonella abony</i>           | NCTC 6017   |
|                    |          | <i>Pseudomonas aeruginosa</i>     | ATCC 9027   |
|                    |          | <i>Escherichia coli</i>           | ATCC 8739   |
| Fungi              |          | <i>Aspergillus flavus</i>         | ATCC 204304 |
|                    |          | <i>Aspergillus niger</i>          | ATCC 16404  |
